# Supplementary material for: Prevalence of Masked Hypertension and Its Association With Subclinical Cardiovascular Disease in African Americans: Results From the Jackson Heart Study
Source: PubMed Central journal article supplement — J Am Heart Assoc. 2016 Mar 29;5(3):e002284. doi: 10.1161/JAHA.115.002284 (PMC4943234; doi:10.1161/jaha.115.002284), 2016-03-29
Supplement: JAH3-5-e002284-s001.pdf [file JAH3-5-e002284-s001.pdf]

## SUPPLEMENTAL MATERIAL

**Table S1.** Characteristics of JHS participants included and not included in the analytic cohort.

|                                    | <b>Included<br/>(n=909)</b> | <b>Not Included<br/>(n=4,392)</b> | <b>p-value</b> |
|------------------------------------|-----------------------------|-----------------------------------|----------------|
| Age, years                         | 59.1 ± 10.9                 | 54.6 ± 13.1                       | <0.001         |
| Female sex, %                      | 69.3                        | 62.3                              | <0.001         |
| Education less than high school, % | 17.6                        | 20.8                              | 0.027          |
| Body mass index, kg/m <sup>2</sup> | 31.1 ± 6.6                  | 31.9 ± 7.4                        | 0.002          |
| Diabetes, %                        | 24.6                        | 21.4                              | 0.035          |
| Clinic SBP, mmHg                   | 127.1 ± 17.4                | 127.0 ± 18.7                      | 0.827          |
| Clinic DBP, mmHg                   | 77.3 ± 10.1                 | 79.1 ± 10.7                       | <0.001         |

Numbers in table are percentage or mean ± standard deviation. P-values were estimated using a two-sample t-test or chi-square test, as appropriate. DBP—diastolic blood pressure; SBP— systolic blood pressure.

**Table S2.** Prevalence of prehypertension and masked hypertension among Jackson Heart Study participants with non-elevated clinic blood pressure (<140/90 mm Hg) stratified by antihypertensive medication use.

| <b>Not taking antihypertensive medication</b> |                                                          |                                                         |             |
|-----------------------------------------------|----------------------------------------------------------|---------------------------------------------------------|-------------|
| Prehypertension                               | Masked hypertension                                      |                                                         | Total       |
|                                               | No                                                       | Yes                                                     |             |
| No                                            | 123<br>Row percentage: 93.2%<br>Column percentage: 49.4% | 9<br>Row percentage: 6.8%<br>Column percentage: 13.2%   | 132 (41.6%) |
| Yes                                           | 126<br>Row percentage: 68.1%<br>Column percentage: 50.6% | 59<br>Row percentage: 31.9%<br>Column percentage: 86.8% | 185 (58.4%) |
| Total                                         | 249 (78.5%)                                              | 68 (21.5%)                                              | 317         |
| <b>Taking antihypertensive medication</b>     |                                                          |                                                         |             |
| Prehypertension                               | Masked hypertension                                      |                                                         | Total       |
|                                               | No                                                       | Yes                                                     |             |

---

|       |                                                          |                                                         |             |
|-------|----------------------------------------------------------|---------------------------------------------------------|-------------|
| No    | 100<br>Row percentage: 80.6%<br>Column percentage: 41.0% | 24<br>Row percentage: 19.4%<br>Column percentage: 20.1% | 124 (34.2%) |
| Yes   | 144<br>Row percentage: 60.3%<br>Column percentage: 59.0% | 95<br>Row percentage: 39.7%<br>Column percentage: 79.8% | 239 (65.8%) |
| Total | 244 (67.2%)                                              | 119 (32.8%)                                             | 363         |

---
